# Supplementary material for: Coupled modelling of hydrological processes and grassland production in two contrasting climates
Source: Copernicus journal article supplement (doi:10.5194/hess-2021-316), 2021-07-26
Supplement: Supplementary file 1 [file hess-2021-316-supplement.pdf]

## Supplementary information

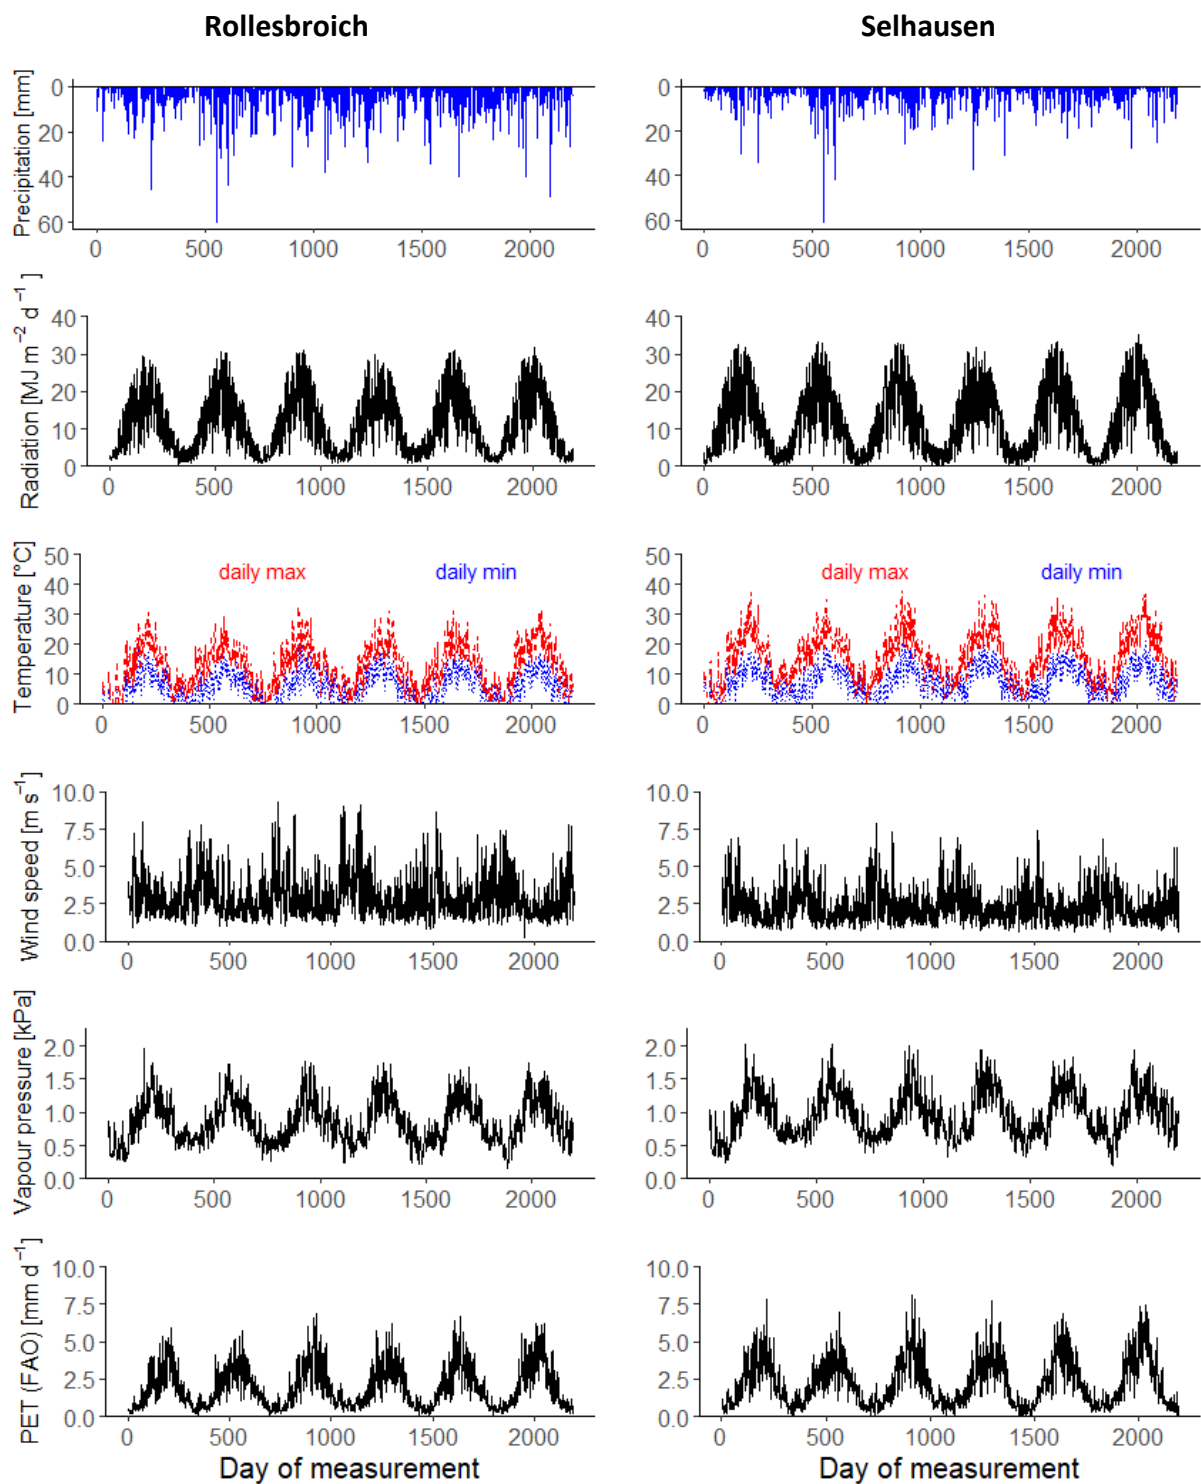

Figure S1: Meteorological variables recorded at Rollesbroich and Selhausen (2013-2018; aggregated to a daily time resolution) and calculated potential evapotranspiration using the FAO version of the Penman-Monteith equation (Allen et al., 1998).

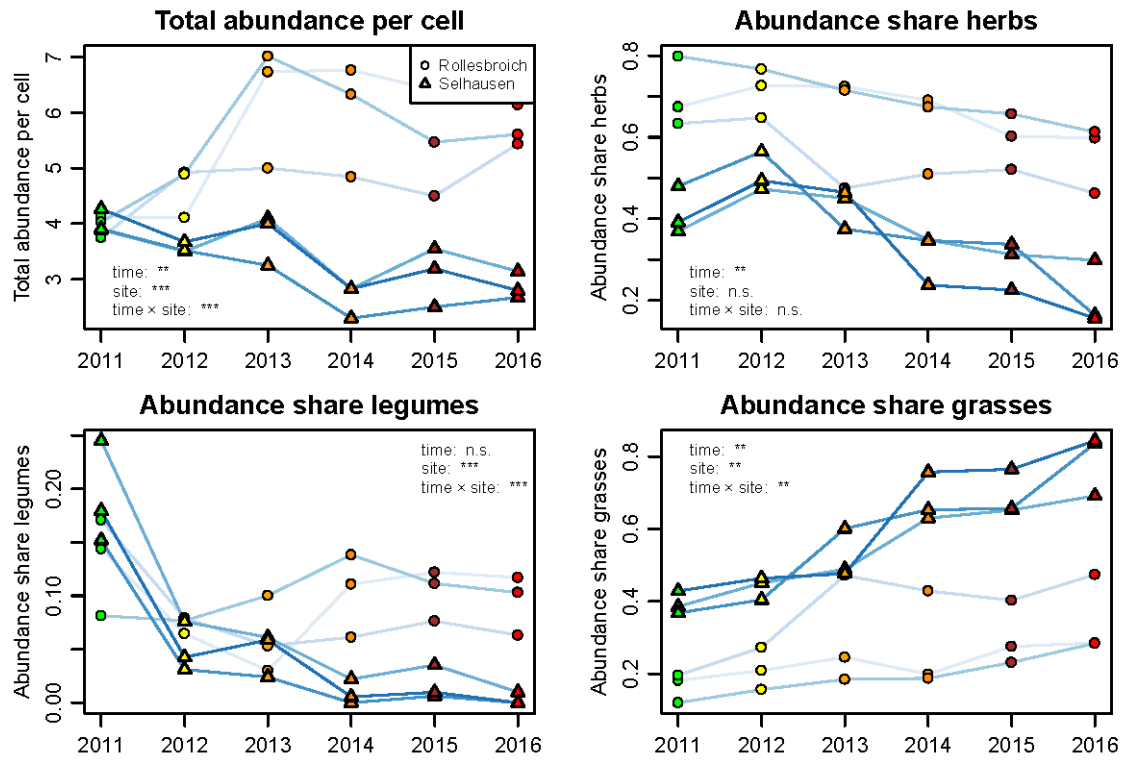

Figure S2. Total species abundance per cell and relative abundances of functional plant types. The results of a linear model analysis are depicted in each figure to indicate the significance of the effects of time, site (Rollesbroich vs. Selhausen) and the interaction of time and site: n.s.  $p > 0.1$ ,  $p < 0.1$ , \*  $p < 0.05$ , \*\*  $p < 0.01$ , \*\*\*  $p < 0.001$ .

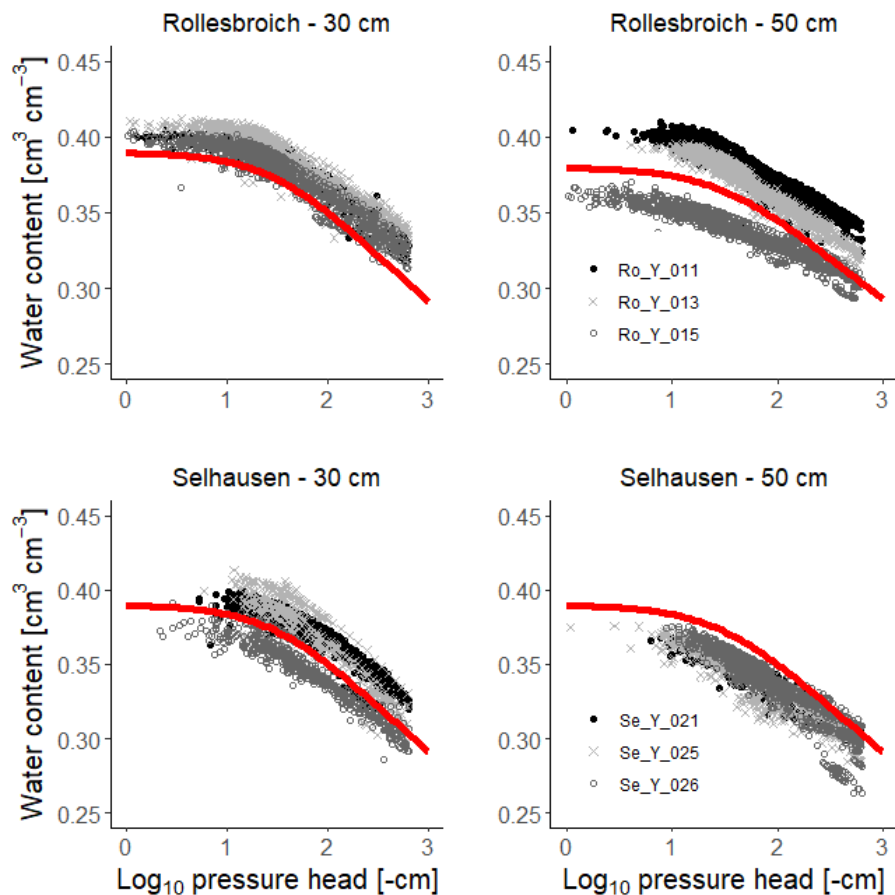

Figure S3. Paired measurements of soil water content and pressure head at 30 and 50 cm depth at Selhausen and Rollesbroich in the period 2013-2018. The red lines show the common water retention curves used in the modelling for the two sites at each depth (the equivalent parameter values are shown in table 3 in the paper). Table S1 below shows parameter values derived from least-squares fits to the individual data series for each lysimeter/depth combination.

Table S1. van Genuchten parameters derived from fits to individual data sets

| Depths (cm) | Lysimeter | $\theta_s$ (m <sup>3</sup> m <sup>-3</sup> ) | $\alpha$ (cm <sup>-1</sup> ) | $n$ (-) |
|-------------|-----------|----------------------------------------------|------------------------------|---------|
| 30          | Se_Y_021  | 0.391                                        | 0.005                        | 1.17    |
|             | Se_Y_025  | 0.391                                        | 0.003                        | 1.33    |
|             | Se_Y_026  | 0.379                                        | 0.030                        | 1.09    |
| 50          | Ro_Y_011  | 0.402                                        | 0.020                        | 1.06    |
|             | Ro_Y_013  | 0.409                                        | 0.030                        | 1.07    |
|             | Ro_Y_015  | 0.400                                        | 0.030                        | 1.05    |

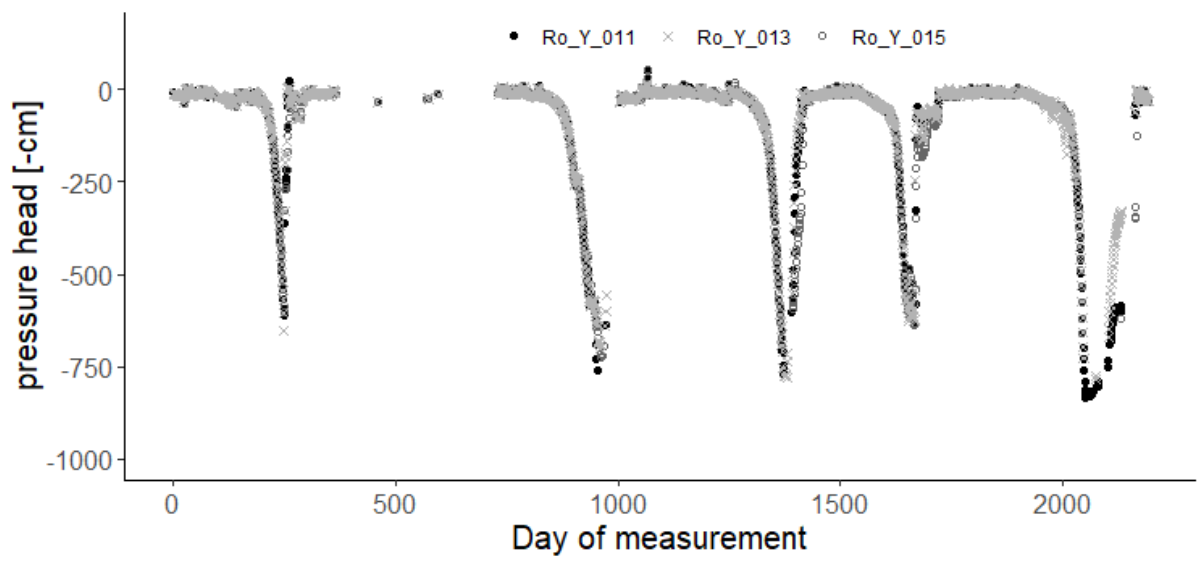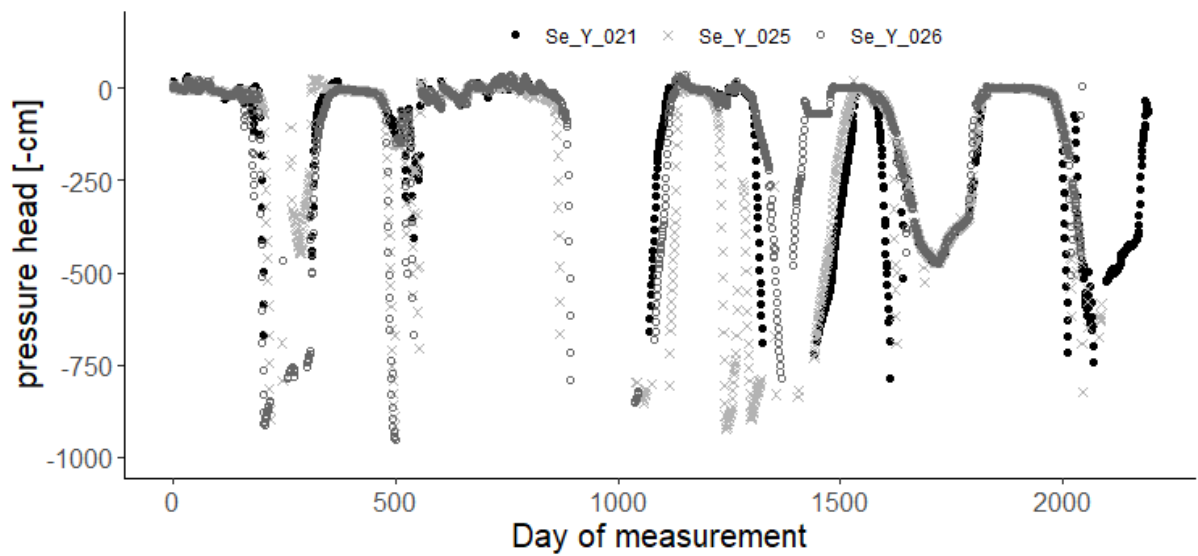

Figure S4. Pressure heads measured in the surrounding soil at 1.4 m depth at the two sites in the period 2013-2018 (day zero is 1<sup>st</sup> January 2013).

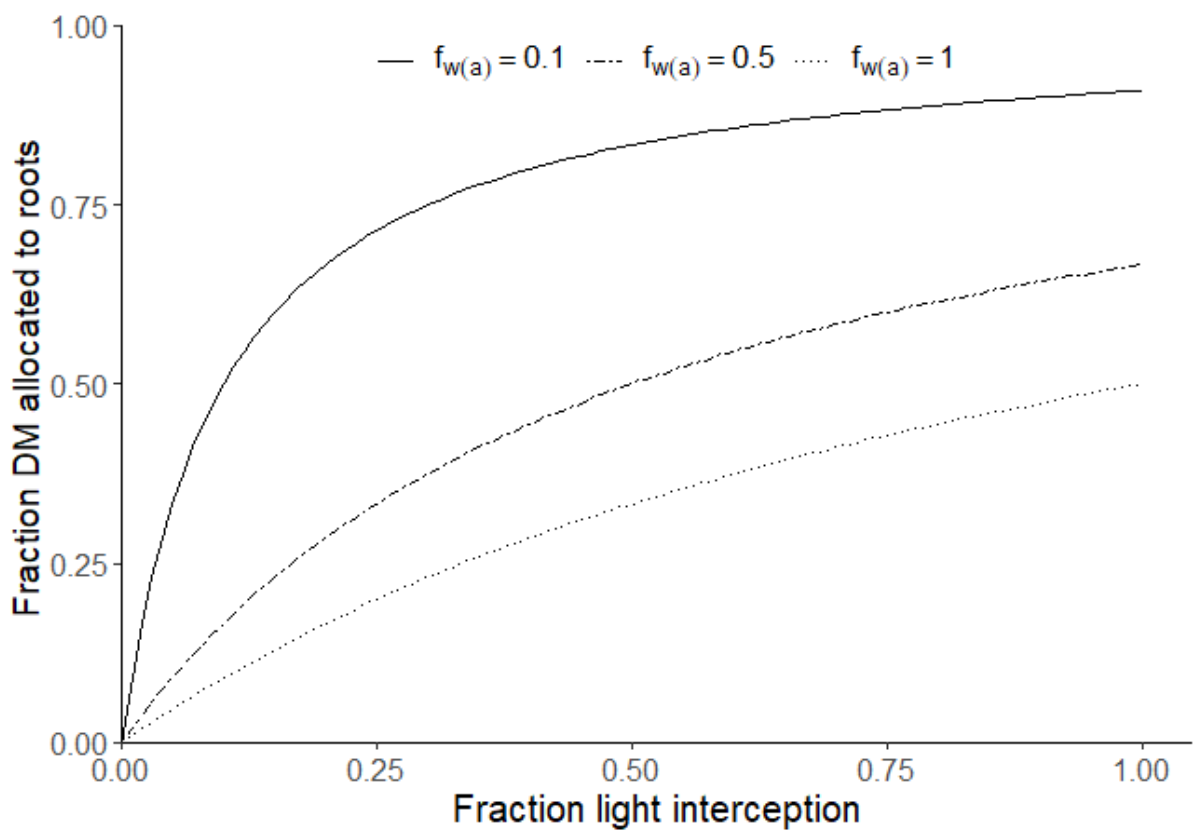

Figure S5. Illustration of equation 30, showing how DM allocation in the model varies as a function of light interception ( $f_{int}$  in equation 12) and soil water stress ( $f_{w(a)}$  in equation 35). In this example, the proportion of DM allocated to roots under optimal conditions,  $f_{bg(opt)}$ , is set to 0.5, while air temperature is within the optimum range (i.e.  $f_{t(a)} = 1$ , equation 36).

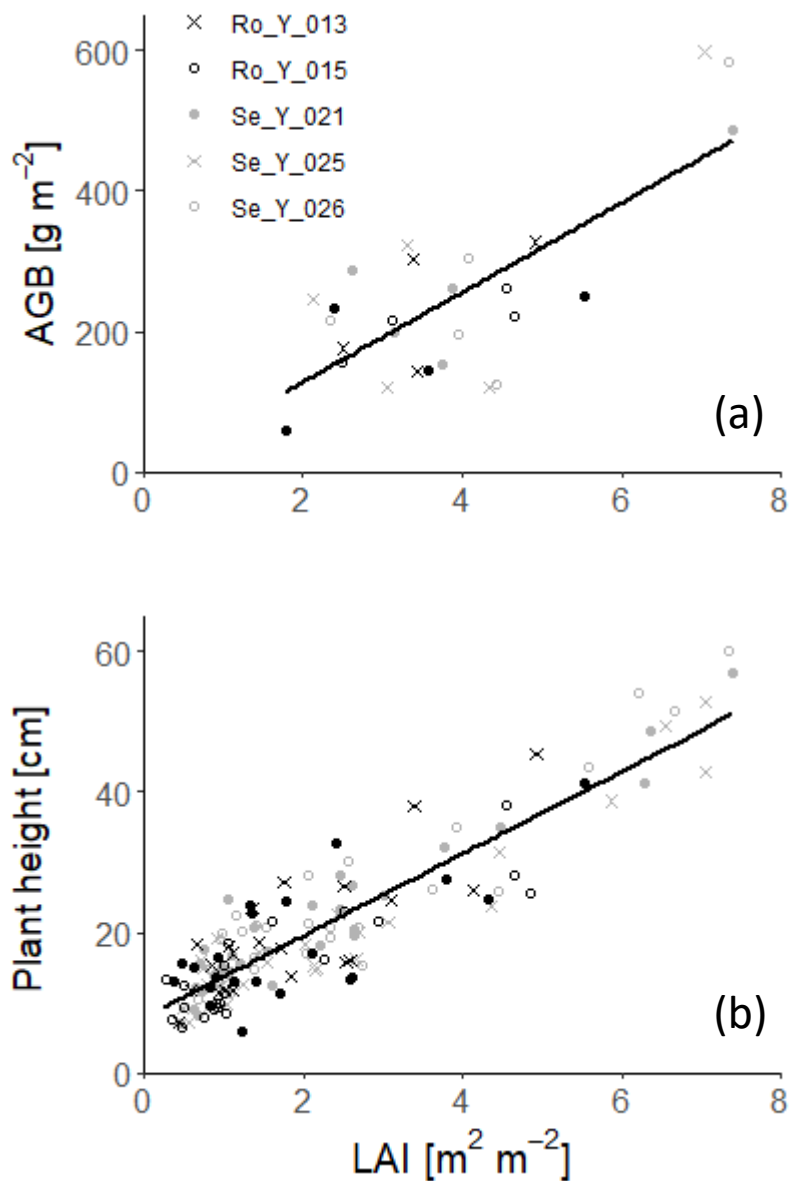

Figure S6. Relationships between leaf area index (LAI) at Rollesbroich and Selhausen (data from 2013-2018) and (a) above-ground biomass (linear regression forced through origin,  $\text{AGB} (\text{g m}^{-2}) = 63.8 \text{ LAI}$ ;  $p < 0.0001$ ,  $\text{RMSE} = 86.7 \text{ g m}^{-2}$ ) and (b) plant height. A bi-linear function was used in the model to describe this relationship; the linear regression equation shown on the figure was used for  $\text{LAI} > 0.2$ ;  $\text{Height (cm)} = 7.84 + 5.85 \text{ LAI}$ ;  $R^2 = 0.81$ ,  $p < 0.0001$ ,  $\text{RMSE} = 4.8 \text{ cm}$ , while for  $\text{LAI} < 0.2$ ,  $\text{Height (cm)} = 45 \text{ LAI}$ .

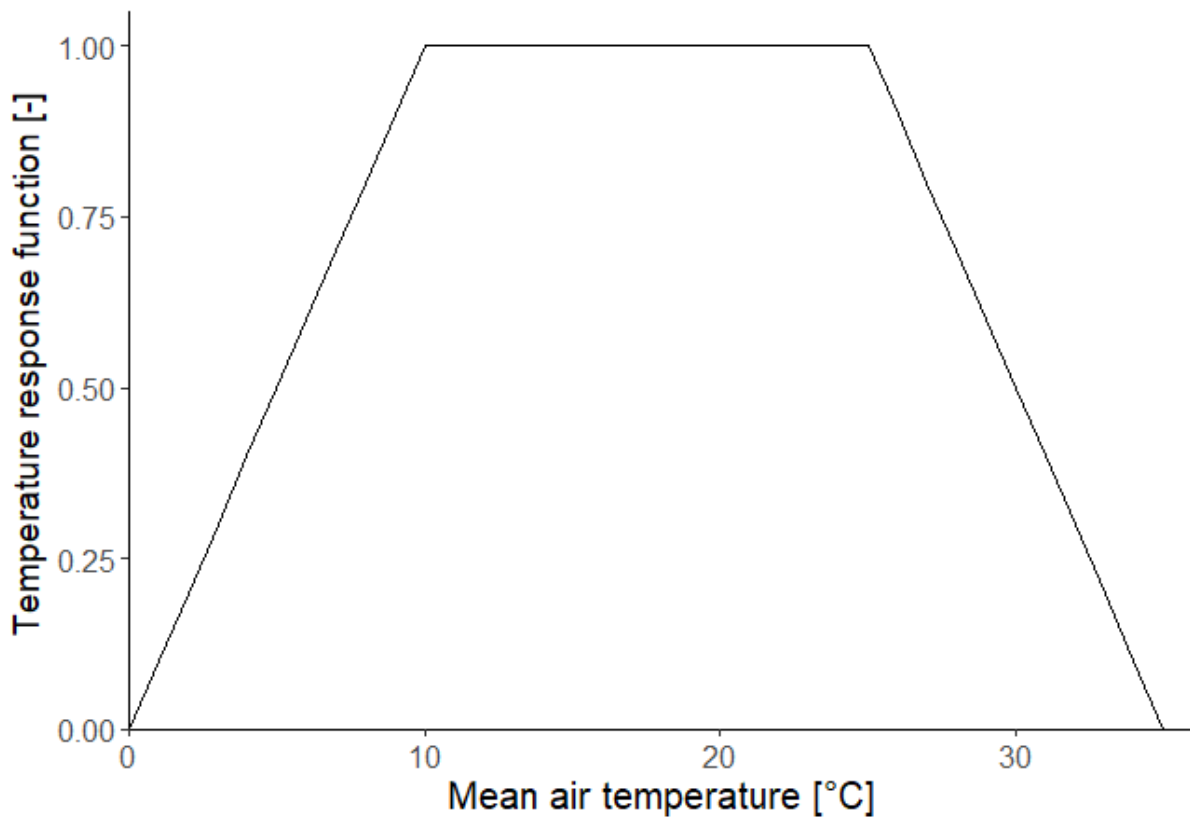

Figure S7. Illustration of the temperature response function in the model (equation 36). In this example,  $T_b = 0^\circ\text{C}$ ,  $T_{o(\text{low})} = 10^\circ\text{C}$ ,  $T_{o(\text{high})} = 25^\circ\text{C}$  and  $T_c = 35^\circ\text{C}$ .

Table S2. Sensitivity analysis: sampled parameter ranges and Spearman rank partial correlation coefficients (\*\*p<0.01; \*p<0.05)

| Parameter                                                                           | Sampled range | Selhausen          |                | Rollesbroich       |                |
|-------------------------------------------------------------------------------------|---------------|--------------------|----------------|--------------------|----------------|
|                                                                                     |               | Evapotranspiration | Harvest        | Evapotranspiration | Harvest        |
| <b>Soil parameters</b>                                                              |               |                    |                |                    |                |
| van Genuchten's $\alpha$ (cm <sup>-1</sup> )                                        | 0.02 to 0.03  | <b>-0.39**</b>     | 0.01           | -0.15*             | <b>0.17**</b>  |
| Scaling factor for van Genuchten's $n$ (-)                                          | 0.95 to 1.05  | <b>0.39**</b>      | <b>0.37**</b>  | <b>0.36**</b>      | <b>0.20**</b>  |
| Scaling factor for hydraulic conductivity, $K_{10}$ (-)                             | 0.8 to 1.2    | <b>0.41**</b>      | 0.12           | 0.10               | -0.10          |
| Surface resistance of wet soil, $r_s^5$ (s m <sup>-1</sup> )                        | 5 to 25       | <b>-0.34**</b>     | 0.04           | <b>-0.60**</b>     | 0.03           |
| <b>Above-ground plant parameters</b>                                                |               |                    |                |                    |                |
| Maximum radiation use efficiency, $RUE_{max}$ (MJ m <sup>-2</sup> d <sup>-1</sup> ) | 1.4 to 1.8    | <b>0.55**</b>      | <b>0.66**</b>  | <b>0.57**</b>      | <b>0.74**</b>  |
| Radiation extinction coefficient, $\beta$ (-)                                       | 0.4 to 0.8    | <b>0.68**</b>      | <b>0.72**</b>  | <b>0.64**</b>      | <b>0.87**</b>  |
| Light saturation constant, $R_{50}$ (MJ m <sup>-2</sup> d <sup>-1</sup> )           | 0 to 10       | <b>-0.48**</b>     | <b>0.28**</b>  | <b>-0.63**</b>     | 0.15*          |
| Leaf loss coefficient, $k_{ag}$ (d <sup>-1</sup> )                                  | 0.005 to 0.05 | <b>-0.54**</b>     | <b>-0.65**</b> | <b>-0.60**</b>     | <b>-0.72**</b> |
| Maximum stomatal conductance, $k_{sto(max)}$ (cm s <sup>-1</sup> )                  | 0.5 to 1.5    | <b>0.66**</b>      | <b>-0.66**</b> | <b>0.77**</b>      | <b>-0.39**</b> |
| Specific leaf area, $S_{leaf}$ (cm <sup>2</sup> g <sup>-1</sup> )                   | 130-150       | <b>0.32**</b>      | 0.01           | <b>0.29**</b>      | <b>0.23**</b>  |
| Base temperature (for leaf loss and allocation), $T_b$ (°C)                         | 3 to 6        | -0.07              | -0.11          | <b>-0.22**</b>     | <b>-0.34**</b> |
| Optimum temperature, $T_{o(low)}$ (°C)                                              | 9 to 15       | <b>-0.64**</b>     | <b>-0.59**</b> | <b>-0.71**</b>     | <b>-0.81**</b> |
| Optimum temperature, $T_{o(high)}$ (°C)                                             | 20 to 30      | 0.04               | 0.00           | -0.09              | -0.05          |
| Ceiling temperature, $T_c$ (°C)                                                     | 30 to 40      | 0.11               | 0.06           | 0.02               | 0.06           |
| Limiting potential for transpiration cessation, $\psi_w$ (m)                        | 100 to 150    | 0.02               | 0.04           | 0.08               | 0.01           |
| Limiting potential (DM allocation, leaf loss), $\psi_{o(crit)}$ (cm)                | 100 to 2000   | <b>0.56**</b>      | <b>0.80**</b>  | <b>0.39**</b>      | <b>0.67**</b>  |
| DM allocation to roots under optimal conditions $f_{bg(opt)}$ (-)                   | 0.4 to 0.6    | <b>-0.38**</b>     | <b>-0.74*</b>  | <b>-0.34**</b>     | <b>-0.78**</b> |
| <b>Root parameters</b>                                                              |               |                    |                |                    |                |
| Root decay constant, $k_{bg}$ (d <sup>-1</sup> )                                    | 0 to 0.02     | <b>-0.37**</b>     | -0.17*         | <b>-0.37**</b>     | -0.02          |
| Root radius, $r_o$ (cm)                                                             | 0.01 to 0.03  | -0.01              | 0.04           | 0.05               | 0.03           |
| Effective root fraction, $\varepsilon$ (-)                                          | 0 to 0.2      | <b>0.62**</b>      | <b>0.44**</b>  | <b>0.56**</b>      | <b>0.19**</b>  |
| Specific root length, $S_{root}$ (m g <sup>-1</sup> )                               | 100 to 140    | 0.15*              | 0.13           | 0.12               | 0.07           |
| Shape factor for root distribution, $c$ (-)                                         | -2 to -1      | -0.07              | 0.09           | -0.10              | 0.02           |
| Maximum root depth, $D_r$ (cm)                                                      | 40 to 90      | <b>0.92**</b>      | <b>0.71**</b>  | <b>0.79**</b>      | <b>0.33**</b>  |



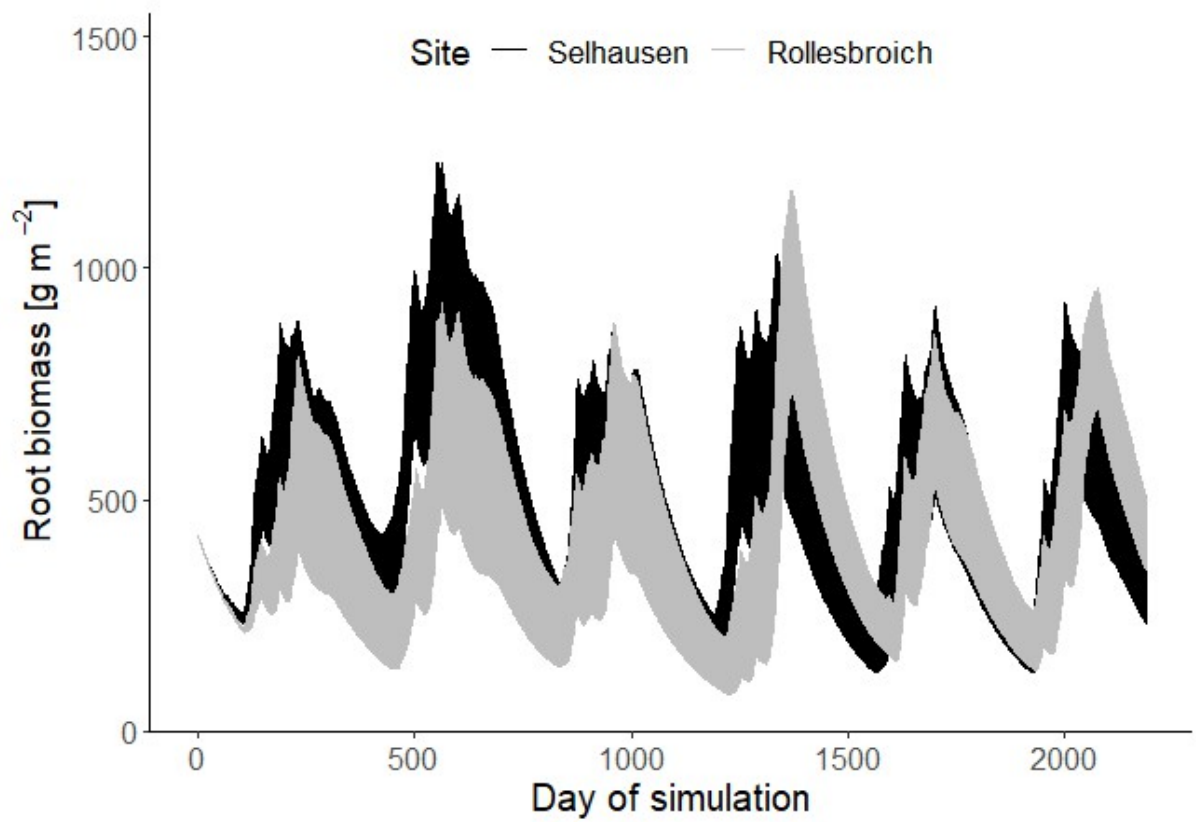

Figure S8. Temporal dynamics of root biomass at Rollesbroich and Selhausen simulated by the model for the 30 acceptable parameterizations
